# Supplementary figures and images for: Metabolome-genome-wide association study dissects genetic architecture for generating natural variation in rice secondary metabolism
Source: PubMed Central journal article supplement — Plant J. 2014 Sep 29;81(1):13–23. doi: 10.1111/tpj.12681 (PMC4309412; doi:10.1111/tpj.12681), 2014-09-29

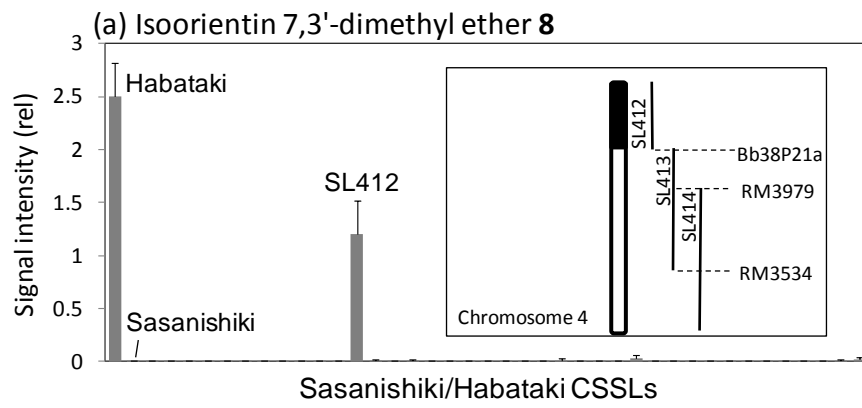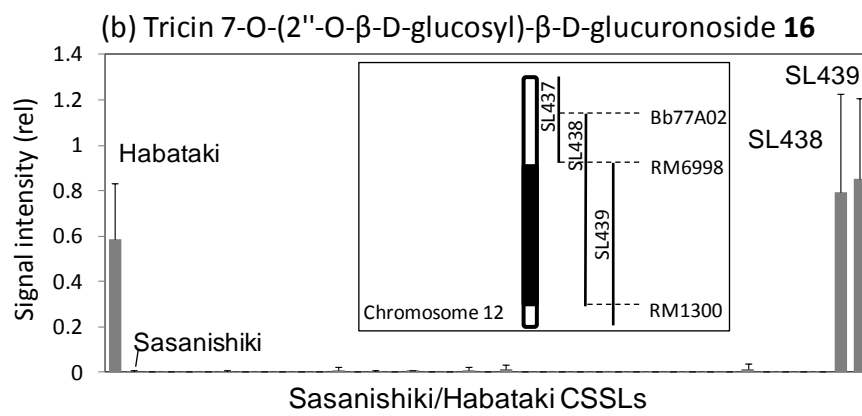

Supplement: tpj0081-0013-sd3.pdf [file tpj0081-0013-sd3.pdf]



Supplement: tpj0081-0013-sd4.pdf [file tpj0081-0013-sd4.pdf]
